# Supplementary material for: Risk Stratification for Management of Solitary Fibrous Tumor/Hemangiopericytoma of the Central Nervous System
Source: MDPI journal article supplement (doi:10.3390/cancers15030876), 2023-01-31
Supplement: s1 [file s1]

Supplemental Table S6- Univariable and Multivariable Analysis of Overall Survival in the High-Risk Group.

| Characteristic                         | Univariable     |                     |                  | Multivariable   |                     |                  |
|----------------------------------------|-----------------|---------------------|------------------|-----------------|---------------------|------------------|
|                                        | HR <sup>1</sup> | 95% CI <sup>1</sup> | p-value          | HR <sup>1</sup> | 95% CI <sup>1</sup> | p-value          |
| <b>Age</b>                             | 1.05            | 1.04, 1.07          | <b>&lt;0.001</b> | 1.05            | 1.03, 1.07          | <b>&lt;0.001</b> |
| <b>Sex</b>                             |                 |                     |                  |                 |                     |                  |
| Male                                   | —               | —                   |                  |                 |                     |                  |
| Female                                 | 0.70            | 0.44, 1.11          | 0.13             |                 |                     |                  |
| <b>Race</b>                            |                 |                     |                  |                 |                     |                  |
| White                                  | —               | —                   |                  |                 |                     |                  |
| Black                                  | 0.56            | 0.20, 1.54          | 0.26             |                 |                     |                  |
| Other/Unknown                          | 0.56            | 0.08, 4.06          | 0.57             |                 |                     |                  |
| Asian/Pacific Islander                 | 0.57            | 0.14, 2.34          | 0.44             |                 |                     |                  |
| <b>Charlson-Deyo Comorbidity Index</b> |                 |                     |                  |                 |                     |                  |
| 0                                      | —               | —                   |                  |                 |                     |                  |
| 1                                      | 1.41            | 0.78, 2.57          | 0.26             |                 |                     |                  |
| 2 or more                              | 1.55            | 0.78, 3.06          | 0.21             |                 |                     |                  |
| <b>Site</b>                            |                 |                     |                  |                 |                     |                  |
| Brain                                  | —               | —                   |                  |                 |                     |                  |
| Spinal/Other CNS                       | 0.97            | 0.52, 1.82          | 0.94             |                 |                     |                  |
| <b>Tumor Size</b>                      |                 |                     |                  |                 |                     |                  |
| Less5cm                                | —               | —                   |                  |                 |                     |                  |
| Great5cm                               | 0.95            | 0.54, 1.67          | 0.87             |                 |                     |                  |
| Unknown                                | 1.26            | 0.72, 2.18          | 0.42             |                 |                     |                  |
| <b>EOR</b>                             |                 |                     |                  |                 |                     |                  |
| No surgery/STR                         | —               | —                   |                  | —               | —                   |                  |
| GTR                                    | 0.47            | 0.28, 0.76          | <b>0.002</b>     | 0.54            | 0.33, 0.88          | <b>0.014</b>     |
| <b>Radiation</b>                       |                 |                     |                  |                 |                     |                  |
| No radiotherapy                        | —               | —                   |                  | —               | —                   |                  |
| Radiotherapy                           | 0.46            | 0.29, 0.74          | <b>0.001</b>     | 0.59            | 0.36, 0.95          | <b>0.031</b>     |

<sup>1</sup>HR = Hazard Ratio, CI = Confidence Interval
