# Supplementary material for: Risk Stratification for Management of Solitary Fibrous Tumor/Hemangiopericytoma of the Central Nervous System
Source: MDPI journal article supplement (doi:10.3390/cancers15030876), 2023-01-31
Supplement: s1 [file s1]

| Characteristic                | Univariable     |                     |                  | Multivariable   |                     |                  |
|-------------------------------|-----------------|---------------------|------------------|-----------------|---------------------|------------------|
|                               | HR <sup>1</sup> | 95% CI <sup>1</sup> | p-value          | HR <sup>1</sup> | 95% CI <sup>1</sup> | p-value          |
| <b>Age</b>                    | 1.04            | 1.03, 1.05          | <b>&lt;0.001</b> | 1.04            | 1.03, 1.05          | <b>&lt;0.001</b> |
| <b>Sex</b>                    |                 |                     |                  |                 |                     |                  |
| Female                        | —               | —                   |                  |                 |                     |                  |
| Male                          | 1.01            | 0.76, 1.33          | 0.96             |                 |                     |                  |
| <b>Race</b>                   |                 |                     |                  |                 |                     |                  |
| White                         | —               | —                   |                  |                 |                     |                  |
| Asian or Pacific Islander     |                 |                     |                  |                 |                     |                  |
| Black                         | 1.02            | 0.61, 1.70          | 0.94             |                 |                     |                  |
| American Indian/Alaska Native |                 |                     |                  |                 |                     |                  |
| Unknown                       | 0.57            | 0.08, 4.06          | 0.57             |                 |                     |                  |
| <b>Site</b>                   |                 |                     |                  |                 |                     |                  |
| Brain                         | —               | —                   |                  | —               | —                   |                  |
| Spinal/Other CNS              | 0.59            | 0.38, 0.92          | <b>0.020</b>     | 0.66            | 0.41, 1.07          | 0.090            |
| <b>Risk</b>                   |                 |                     |                  |                 |                     |                  |
| Low-risk                      | —               | —                   |                  | —               | —                   |                  |
| Intermediate-risk             | 1.90            | 1.25, 2.90          | <b>0.003</b>     | 1.94            | 1.27, 2.95          | <b>0.002</b>     |
| High-risk                     | 2.76            | 1.86, 4.08          | <b>&lt;0.001</b> | 2.62            | 1.76, 3.92          | <b>&lt;0.001</b> |

| Characteristic | Univariable     |                     |         | Multivariable   |                     |         |
|----------------|-----------------|---------------------|---------|-----------------|---------------------|---------|
|                | HR <sup>1</sup> | 95% CI <sup>1</sup> | p-value | HR <sup>1</sup> | 95% CI <sup>1</sup> | p-value |

<sup>1</sup>HR = Hazard Ratio, CI = Confidence Interval

Supplemental Table S3- Univariable and Multivariable Analysis of Overall Survival in SEER
