# Supplementary material for: Risk Stratification for Management of Solitary Fibrous Tumor/Hemangiopericytoma of the Central Nervous System
Source: MDPI journal article supplement (doi:10.3390/cancers15030876), 2023-01-31
Supplement: s1 [file s1]

| Characteristic                         | Univariable     |                     |                  | Multivariable   |                     |                  |
|----------------------------------------|-----------------|---------------------|------------------|-----------------|---------------------|------------------|
|                                        | HR <sup>1</sup> | 95% CI <sup>1</sup> | p-value          | HR <sup>1</sup> | 95% CI <sup>1</sup> | p-value          |
| <b>Age</b>                             | 1.07            | 1.04, 1.09          | <b>&lt;0.001</b> | 1.07            | 1.04, 1.09          | <b>&lt;0.001</b> |
| <b>Sex</b>                             |                 |                     |                  |                 |                     |                  |
| Male                                   | —               | —                   |                  |                 |                     |                  |
| Female                                 | 0.85            | 0.44, 1.66          | 0.64             |                 |                     |                  |
| <b>Race</b>                            |                 |                     |                  |                 |                     |                  |
| White                                  | —               | —                   |                  |                 |                     |                  |
| Black                                  | 0.76            | 0.23, 2.48          | 0.64             |                 |                     |                  |
| Other/Unknown                          | 0.00            | 0.00, Inf           | >0.99            |                 |                     |                  |
| Asian/Pacific Islander                 | 0.00            | 0.00, Inf           | >0.99            |                 |                     |                  |
| <b>Charlson-Deyo Comorbidity Index</b> |                 |                     |                  |                 |                     |                  |
| 0                                      | —               | —                   |                  |                 |                     |                  |
| 1                                      | 1.62            | 0.73, 3.59          | 0.23             |                 |                     |                  |
| 2 or more                              | 0.45            | 0.06, 3.29          | 0.43             |                 |                     |                  |
| <b>Site</b>                            |                 |                     |                  |                 |                     |                  |
| Brain                                  | —               | —                   |                  |                 |                     |                  |
| Spinal/Other CNS                       | 0.49            | 0.19, 1.26          | 0.14             |                 |                     |                  |
| <b>Tumor Size</b>                      |                 |                     |                  |                 |                     |                  |
| 5cm or less                            | —               | —                   |                  |                 |                     |                  |
| Greater than 5cm                       | 1.08            | 0.50, 2.37          | 0.84             |                 |                     |                  |
| Unknown                                | 0.62            | 0.27, 1.45          | 0.27             |                 |                     |                  |
| <b>Radiation</b>                       |                 |                     |                  |                 |                     |                  |
| No radiotherapy                        | —               | —                   |                  |                 |                     |                  |
| Radiotherapy                           | 0.65            | 0.32, 1.31          | 0.23             |                 |                     |                  |

<sup>1</sup>HR = Hazard Ratio, CI = Confidence Interval

Supplemental Table S10- Univariable and Multivariable Analysis of Overall Survival in the Intermediate-Risk Group at 6-Month Landmark
