# Supplementary material for: Risk Stratification for Management of Solitary Fibrous Tumor/Hemangiopericytoma of the Central Nervous System
Source: MDPI journal article supplement (doi:10.3390/cancers15030876), 2023-01-31
Supplement: s1 [file s1]

Supplemental Table S7- Univariable and Multivariable Analysis of Overall Survival in the High-Risk Group at 3-Month Landmark.

| Characteristic                         | Univariable     |                     |                  | Multivariable   |                     |                  |
|----------------------------------------|-----------------|---------------------|------------------|-----------------|---------------------|------------------|
|                                        | HR <sup>1</sup> | 95% CI <sup>1</sup> | p-value          | HR <sup>1</sup> | 95% CI <sup>1</sup> | p-value          |
| <b>Age</b>                             | 1.05            | 1.03, 1.07          | <b>&lt;0.001</b> | 1.05            | 1.03, 1.07          | <b>&lt;0.001</b> |
| <b>Sex</b>                             |                 |                     |                  |                 |                     |                  |
| Male                                   | —               | —                   |                  | —               | —                   |                  |
| Female                                 | 0.60            | 0.37, 0.98          | <b>0.040</b>     | 0.55            | 0.33, 0.92          | <b>0.022</b>     |
| <b>Race</b>                            |                 |                     |                  |                 |                     |                  |
| White                                  | —               | —                   |                  |                 |                     |                  |
| Black                                  | 0.61            | 0.22, 1.68          | 0.34             |                 |                     |                  |
| Other/Unknown                          | 0.61            | 0.08, 4.41          | 0.62             |                 |                     |                  |
| Asian/Pacific Islander                 | 0.64            | 0.16, 2.62          | 0.53             |                 |                     |                  |
| <b>Charlson-Deyo Comorbidity Index</b> |                 |                     |                  |                 |                     |                  |
| 0                                      | —               | —                   |                  |                 |                     |                  |
| 1                                      | 1.46            | 0.78, 2.72          | 0.23             |                 |                     |                  |
| 2 or more                              | 1.73            | 0.87, 3.44          | 0.12             |                 |                     |                  |
| <b>Site</b>                            |                 |                     |                  |                 |                     |                  |
| Brain                                  | —               | —                   |                  |                 |                     |                  |
| Spinal/Other CNS                       | 0.85            | 0.43, 1.68          | 0.65             |                 |                     |                  |
| <b>Tumor Size</b>                      |                 |                     |                  |                 |                     |                  |
| 5cm or less                            | —               | —                   |                  |                 |                     |                  |
| Greater than 5cm                       | 0.85            | 0.47, 1.53          | 0.58             |                 |                     |                  |
| Unknown                                | 1.23            | 0.70, 2.18          | 0.47             |                 |                     |                  |
| <b>EOR</b>                             |                 |                     |                  |                 |                     |                  |
| No surgery/STR                         | —               | —                   |                  | —               | —                   |                  |
| GTR                                    | 0.53            | 0.32, 0.87          | <b>0.012</b>     | 0.69            | 0.41, 1.15          | 0.16             |
| <b>Radiation</b>                       |                 |                     |                  |                 |                     |                  |
| No radiotherapy                        | —               | —                   |                  | —               | —                   |                  |
| Radiotherapy                           | 0.51            | 0.31, 0.84          | <b>0.008</b>     | 0.64            | 0.39, 1.07          | 0.087            |

<sup>1</sup>HR = Hazard Ratio, CI = Confidence Interval
