# Supplementary material for: Risk Stratification for Management of Solitary Fibrous Tumor/Hemangiopericytoma of the Central Nervous System
Source: MDPI journal article supplement (doi:10.3390/cancers15030876), 2023-01-31
Supplement: s1 [file s1]

| Characteristic                         | Univariable     |                     |                  | Multivariable   |                     |                  |
|----------------------------------------|-----------------|---------------------|------------------|-----------------|---------------------|------------------|
|                                        | HR <sup>1</sup> | 95% CI <sup>1</sup> | p-value          | HR <sup>1</sup> | 95% CI <sup>1</sup> | p-value          |
| <b>Age</b>                             | 1.08            | 1.05, 1.11          | <b>&lt;0.001</b> | 1.08            | 1.05, 1.11          | <b>&lt;0.001</b> |
| <b>Sex</b>                             |                 |                     |                  |                 |                     |                  |
| Male                                   | —               | —                   |                  |                 |                     |                  |
| Female                                 | 0.91            | 0.45, 1.84          | 0.79             |                 |                     |                  |
| <b>Race</b>                            |                 |                     |                  |                 |                     |                  |
| White                                  | —               | —                   |                  |                 |                     |                  |
| Black                                  | 0.69            | 0.16, 2.90          | 0.61             |                 |                     |                  |
| Other/Unknown                          | 0.74            | 0.10, 5.43          | 0.76             |                 |                     |                  |
| Asian/Pacific Islander                 | 0.37            | 0.05, 2.71          | 0.33             |                 |                     |                  |
| <b>Charlson-Deyo Comorbidity Index</b> |                 |                     |                  |                 |                     |                  |
| 0                                      | —               | —                   |                  | —               | —                   |                  |
| 1                                      | 0.85            | 0.29, 2.46          | 0.76             | 0.64            | 0.22, 1.86          | 0.41             |
| 2 or more                              | 3.83            | 1.45, 10.1          | <b>0.007</b>     | 3.49            | 1.30, 9.34          | <b>0.013</b>     |
| <b>Tumor Size</b>                      |                 |                     |                  |                 |                     |                  |
| 5cm or less                            | —               | —                   |                  |                 |                     |                  |
| Greater than 5cm                       | 1.15            | 0.50, 2.65          | 0.75             |                 |                     |                  |
| Unknown                                | 1.94            | 0.80, 4.71          | 0.14             |                 |                     |                  |
| <b>Site</b>                            |                 |                     |                  |                 |                     |                  |
| Brain                                  | —               | —                   |                  |                 |                     |                  |
| Spinal/Other CNS                       | 1.00            | 0.43, 2.33          | >0.99            |                 |                     |                  |
| <b>Radiation</b>                       |                 |                     |                  |                 |                     |                  |
| No radiotherapy                        | —               | —                   |                  |                 |                     |                  |
| Radiotherapy                           | 1.26            | 0.60, 2.65          | 0.55             |                 |                     |                  |

<sup>1</sup>HR = Hazard Ratio, CI = Confidence Interval

Supplemental Table S4- Univariable and Multivariable Analysis of Overall Survival in the Low-Risk Group.
