# Supplementary material for: Risk Stratification for Management of Solitary Fibrous Tumor/Hemangiopericytoma of the Central Nervous System
Source: MDPI journal article supplement (doi:10.3390/cancers15030876), 2023-01-31
Supplement: s1 [file s1]

Supplemental Table S8- Univariable and Multivariable Analysis of Overall Survival in the High-Risk Group at 6-Month Landmark.

| Characteristic                         | Univariable     |                     |                  | Multivariable   |                     |                  |
|----------------------------------------|-----------------|---------------------|------------------|-----------------|---------------------|------------------|
|                                        | HR <sup>1</sup> | 95% CI <sup>1</sup> | p-value          | HR <sup>1</sup> | 95% CI <sup>1</sup> | p-value          |
| <b>Age</b>                             | 1.05            | 1.03, 1.07          | <b>&lt;0.001</b> | 1.05            | 1.03, 1.07          | <b>&lt;0.001</b> |
| <b>Sex</b>                             |                 |                     |                  |                 |                     |                  |
| Male                                   | —               | —                   |                  |                 |                     |                  |
| Female                                 | 0.65            | 0.39, 1.06          | 0.082            |                 |                     |                  |
| <b>Race</b>                            |                 |                     |                  |                 |                     |                  |
| White                                  | —               | —                   |                  |                 |                     |                  |
| Black                                  | 0.64            | 0.23, 1.76          | 0.38             |                 |                     |                  |
| Other/Unknown                          | 0.64            | 0.09, 4.61          | 0.65             |                 |                     |                  |
| Asian/Pacific Islander                 | 0.68            | 0.17, 2.78          | 0.59             |                 |                     |                  |
| <b>Charlson-Deyo Comorbidity Index</b> |                 |                     |                  |                 |                     |                  |
| 0                                      | —               | —                   |                  |                 |                     |                  |
| 1                                      | 1.26            | 0.65, 2.45          | 0.50             |                 |                     |                  |
| 2 or more                              | 1.78            | 0.89, 3.55          | 0.10             |                 |                     |                  |
| <b>Site</b>                            |                 |                     |                  |                 |                     |                  |
| Brain                                  | —               | —                   |                  |                 |                     |                  |
| Spinal/Other CNS                       | 0.89            | 0.45, 1.77          | 0.75             |                 |                     |                  |
| <b>Tumor Size</b>                      |                 |                     |                  |                 |                     |                  |
| 5cm or less                            | —               | —                   |                  |                 |                     |                  |
| Greater than 5cm                       | 0.83            | 0.45, 1.52          | 0.54             |                 |                     |                  |
| Unknown                                | 1.24            | 0.69, 2.23          | 0.47             |                 |                     |                  |
| <b>EOR</b>                             |                 |                     |                  |                 |                     |                  |
| No surgery/STR                         | —               | —                   |                  | —               | —                   |                  |
| GTR                                    | 0.49            | 0.29, 0.83          | <b>0.007</b>     | 0.55            | 0.33, 0.92          | <b>0.024</b>     |
| <b>Radiation</b>                       |                 |                     |                  |                 |                     |                  |
| No radiotherapy                        | —               | —                   |                  | —               | —                   |                  |
| Radiotherapy                           | 0.54            | 0.32, 0.90          | <b>0.017</b>     | 0.66            | 0.39, 1.11          | 0.11             |

<sup>1</sup>HR = Hazard Ratio, CI = Confidence Interval
