# Supplementary material for: Risk Stratification for Management of Solitary Fibrous Tumor/Hemangiopericytoma of the Central Nervous System
Source: MDPI journal article supplement (doi:10.3390/cancers15030876), 2023-01-31
Supplement: s1 [file s1]

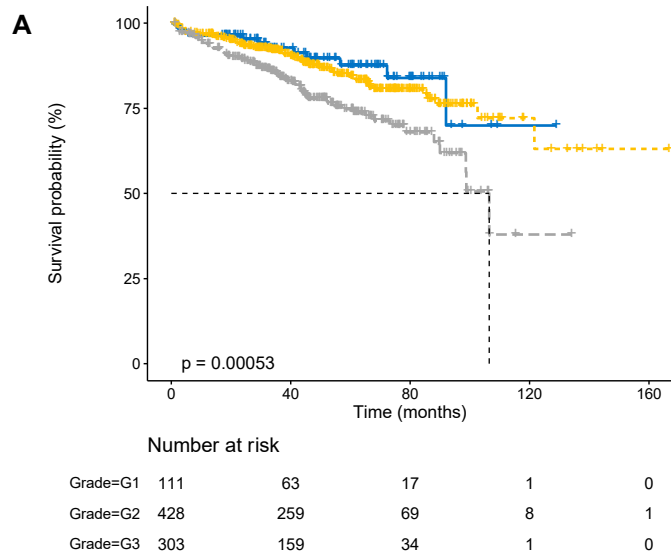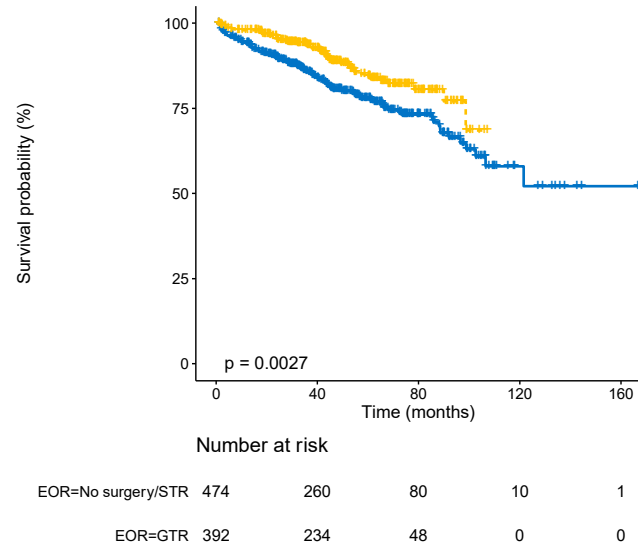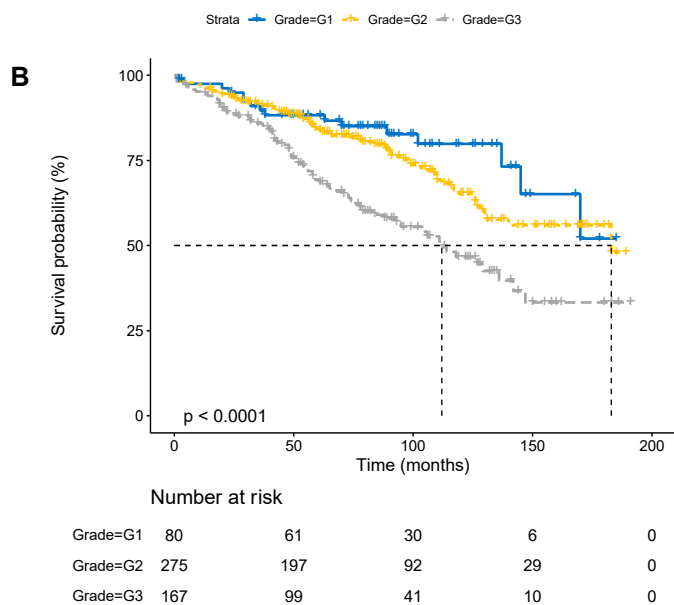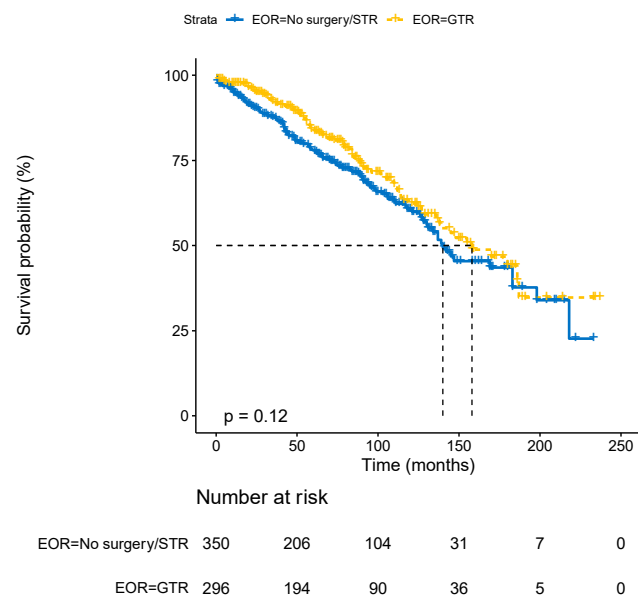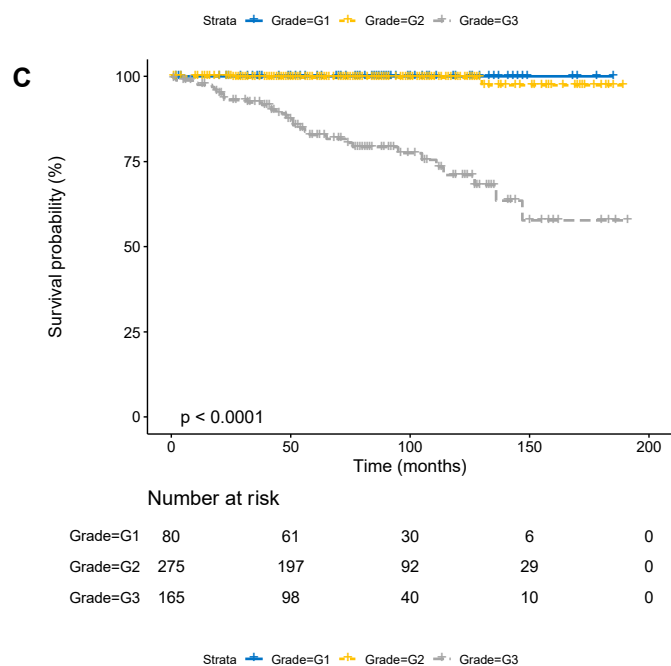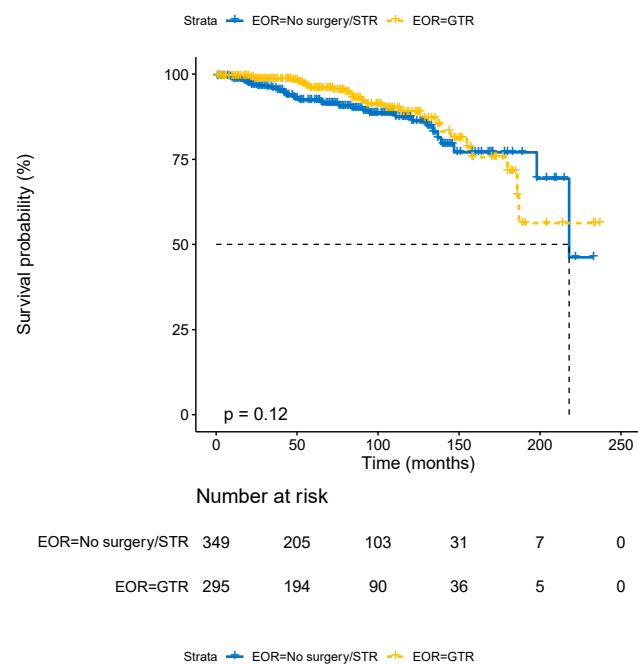

Supplemental Figure S1- Kaplan-Meier curves for overall survival in the NCDB (A) and overall (B) and cause-specific survival (C) in the SEER database based on grade and EOR.

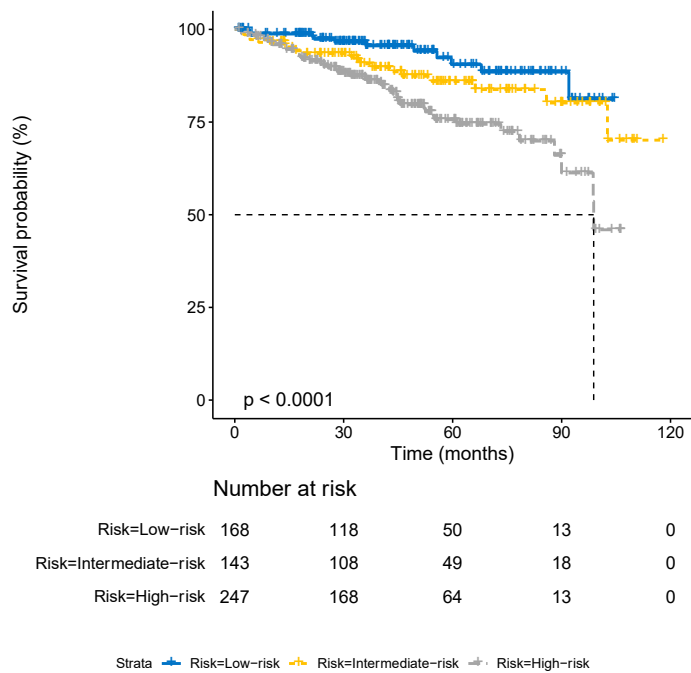

Supplemental Figure S2- Sensitivity Analysis: Kaplan-Meier curves for overall survival in the NCDB, including patients only with all histological datapoints.
