# Supplementary material for: Risk Stratification for Management of Solitary Fibrous Tumor/Hemangiopericytoma of the Central Nervous System
Source: MDPI journal article supplement (doi:10.3390/cancers15030876), 2023-01-31
Supplement: s1 [file s1]

Supplemental Table S1- Demographic and Clinical Characteristics of the SEER Cohort

| Characteristic                | Low-risk, N = 204 <sup>1</sup> | Intermediate-risk, N = 151 <sup>1</sup> | High-risk, N = 167 <sup>1</sup> |
|-------------------------------|--------------------------------|-----------------------------------------|---------------------------------|
| Age                           | 54 (43, 65)                    | 54 (42, 64)                             | 55 (44, 65)                     |
| Sex                           |                                |                                         |                                 |
| Female                        | 97 (48%)                       | 77 (51%)                                | 93 (56%)                        |
| Male                          | 107 (52%)                      | 74 (49%)                                | 74 (44%)                        |
| Race                          |                                |                                         |                                 |
| White                         | 162 (91%)                      | 130 (95%)                               | 133 (88%)                       |
| Asian or Pacific Islander     | 0 (0%)                         | 0 (0%)                                  | 0 (0%)                          |
| Black                         | 16 (8.9%)                      | 7 (5.1%)                                | 17 (11%)                        |
| American Indian/Alaska Native | 0 (0%)                         | 0 (0%)                                  | 0 (0%)                          |
| Unknown                       | 1 (0.6%)                       | 0 (0%)                                  | 1 (0.7%)                        |
| Grade                         |                                |                                         |                                 |
| G1                            | 80 (39%)                       | 0 (0%)                                  | 0 (0%)                          |
| G2                            | 124 (61%)                      | 151 (100%)                              | 0 (0%)                          |
| G3                            | 0 (0%)                         | 0 (0%)                                  | 167 (100%)                      |
| Site                          |                                |                                         |                                 |
| Brain                         | 150 (74%)                      | 109 (72%)                               | 156 (93%)                       |
| Spinal/Other CNS              | 54 (26%)                       | 42 (28%)                                | 11 (6.6%)                       |
| EOR                           |                                |                                         |                                 |
| No surgery/STR                | 49 (24%)                       | 151 (100%)                              | 85 (51%)                        |
| GTR                           | 155 (76%)                      | 0 (0%)                                  | 82 (49%)                        |
| Vital Status                  |                                |                                         |                                 |
| Alive                         | 165 (81%)                      | 102 (68%)                               | 97 (58%)                        |
| Dead                          | 39 (19%)                       | 49 (32%)                                | 70 (42%)                        |
| Cause- Specific Death         |                                |                                         |                                 |
| Alive or died of other cause  | 204 (100%)                     | 149 (99%)                               | 132 (80%)                       |
| Died because of this tumor    | 0 (0%)                         | 2 (1.3%)                                | 33 (20%)                        |
| Unknown                       | 0                              | 0                                       | 2                               |
| Follow-Up Time                | 80 (51, 118)                   | 74 (42, 110)                            | 58 (38, 99)                     |

<sup>1</sup>Median (IQR); n (%)
