# Supplementary material for: Risk Stratification for Management of Solitary Fibrous Tumor/Hemangiopericytoma of the Central Nervous System
Source: MDPI journal article supplement (doi:10.3390/cancers15030876), 2023-01-31
Supplement: s1 [file s1]

| Characteristic                         | Univariable     |                     |                  | Multivariable   |                     |                  |
|----------------------------------------|-----------------|---------------------|------------------|-----------------|---------------------|------------------|
|                                        | HR <sup>1</sup> | 95% CI <sup>1</sup> | p-value          | HR <sup>1</sup> | 95% CI <sup>1</sup> | p-value          |
| <b>Age</b>                             | 1.06            | 1.05, 1.08          | <b>&lt;0.001</b> | 1.06            | 1.05, 1.08          | <b>&lt;0.001</b> |
| <b>Sex</b>                             |                 |                     |                  |                 |                     |                  |
| Male                                   | —               | —                   |                  |                 |                     |                  |
| Female                                 | 0.77            | 0.55, 1.06          | 0.10             |                 |                     |                  |
| <b>Race</b>                            |                 |                     |                  |                 |                     |                  |
| White                                  | —               | —                   |                  |                 |                     |                  |
| Black                                  | 0.58            | 0.30, 1.14          | 0.11             |                 |                     |                  |
| Other/Unknown                          | 0.50            | 0.12, 2.04          | 0.34             |                 |                     |                  |
| Asian/Pacific Islander                 | 0.33            | 0.11, 1.05          | 0.061            |                 |                     |                  |
| <b>Charlson-Deyo Comorbidity Index</b> |                 |                     |                  |                 |                     |                  |
| 0                                      | —               | —                   |                  | —               | —                   |                  |
| 1                                      | 1.29            | 0.84, 1.97          | 0.24             | 0.92            | 0.60, 1.41          | 0.71             |
| 2 or more                              | 1.80            | 1.08, 3.01          | <b>0.025</b>     | 1.47            | 0.88, 2.47          | 0.14             |
| <b>Tumor Size</b>                      |                 |                     |                  |                 |                     |                  |
| 5cm or less                            | —               | —                   |                  |                 |                     |                  |
| Greater than 5cm                       | 0.90            | 0.61, 1.32          | 0.58             |                 |                     |                  |
| Unknown                                | 1.10            | 0.74, 1.62          | 0.64             |                 |                     |                  |
| <b>Site</b>                            |                 |                     |                  |                 |                     |                  |
| Brain                                  | —               | —                   |                  |                 |                     |                  |
| Spinal/Other CNS                       | 0.88            | 0.59, 1.32          | 0.54             |                 |                     |                  |
| <b>Risk</b>                            |                 |                     |                  |                 |                     |                  |
| Low-risk                               | —               | —                   |                  | —               | —                   |                  |
| Intermediate-risk                      | 1.60            | 1.01, 2.55          | <b>0.045</b>     | 1.52            | 0.95, 2.41          | 0.079            |
| High-risk                              | 2.56            | 1.68, 3.89          | <b>&lt;0.001</b> | 2.38            | 1.56, 3.63          | <b>&lt;0.001</b> |
| <b>Radiation</b>                       |                 |                     |                  |                 |                     |                  |
| No radiotherapy                        | —               | —                   |                  |                 |                     |                  |
| Radiotherapy                           | 0.84            | 0.61, 1.17          | 0.30             |                 |                     |                  |

| Characteristic | Univariable     |                     |         | Multivariable   |                     |         |
|----------------|-----------------|---------------------|---------|-----------------|---------------------|---------|
|                | HR <sup>1</sup> | 95% CI <sup>1</sup> | p-value | HR <sup>1</sup> | 95% CI <sup>1</sup> | p-value |

<sup>1</sup>HR = Hazard Ratio, CI = Confidence Interval

Supplemental Table S2- Univariable and Multivariable Analysis of Overall Survival in the NCDB
