# Supplementary material for: Risk Stratification for Management of Solitary Fibrous Tumor/Hemangiopericytoma of the Central Nervous System
Source: Cancers (Basel). 2023 Jan 31;15(3):876. doi: 10.3390/cancers15030876 (PMC9913704; doi:10.3390/cancers15030876)
Supplement: Supplementary file 1 [file cancers-15-00876-s001.zip]

Archive with 11 entries (11 files):
- Supplemental Figures S1 and S2.pdf
- Supplemental Table S1.pdf
- Supplemental Table S10.pdf
- Supplemental Table S2.pdf
- Supplemental Table S3.pdf
- Supplemental Table S4.pdf
- Supplemental Table S5.pdf
- Supplemental Table S6.pdf
- Supplemental Table S7.pdf
- Supplemental Table S8.pdf
- Supplemental Table S9.pdf
